# Supplementary material
Source: Springer Nature journal article supplement (https://www.springermedizin.de/resource/supplementary/13012_2012_591_MOESM6_ESM.docx/9630352)
Supplement: MOESM6 [file 9630352]

|  |  | **Estimate** | **[95% CI]** | ***P* value** |
| --- | --- | --- | --- | --- |
| **Individual level** | |  |  |  |
|  | Age | -0.13 | [-0.30; 0.05] | .2072 |
|  | Gender: female | -0.87 | [-2.21; 0.48] | .1506 |
| **Practice level** | |  |  |  |
|  | FTE* GP ≥ 2 | 2.11 | [-3.82; 8.05] | .4854 |
|  | FTE* nurse ≥ 2 | -0.26 | [-3.62; 3.09] | .8754 |
|  | Practice location: urban** | -0.26 | [-4.67; 4.15] | .9070 |
|  | Practice score ‘quality management’ *** | -0.30 | [-0.89; 0.30] | .3253 |
|  | Practice score: ‘CVD care’ **** | 1.36 | [0.69; 2.02] | <.0001 |
